# Supplementary material
Source: publisher site journal article supplement (https://www.dovepress.com/get_supplementary_file.php?f=203350.docx)
Supplement: Supplementary file 1 [file get_supplementary_file.php]

**Supplemental Table 1: Characteristics of the HealthCore Integrated Research Database**

| **Attributes** | **HealthCore Population** |
| --- | --- |
| **(%)** |
| **Gender** |  |
| Male | 52.20% |
| Female | 47.80% |
| **US Region** |  |
| Northeast | 24.60% |
| Midwest | 18.70% |
| South | 31.06% |
| West | 25.65% |
| **Age Group** |  |
| 0-9 | 16.34% |
| 10-17 | 9.87% |
| 18-24 | 9.98% |
| 25-34 | 16.23% |
| 35-44 | 15.24% |
| 45-54 | 14.96% |
| 55-64 | 10.83% |
| 65-74 | 4.06% |
| 75+ | 2.49% |
| **Health plan type** |  |
| Commercial | 96.04% |
| Medicare Advantage | 1.82% |
| Medicare Other | 2.14% |
| **Characteristics** |  |  |
| Dates captured | 2006 – 2019 |  |
| Access to medical record data | Determined on a study by study basis after Institutional Review Board (IRB) Approval for the subset of health plans where data agreements allow this use. Medical record requests are provided along with evidence of IRB approval to the rendering clinician or facility, however compliance is not required. Only specific records covered by the IRB approval were provided and subsequently abstracted by trained nurses to complete a structured questionnaire. |  |
| Types of facilities included in claims data | All office visit, outpatient, emergency department, and inpatient care sites submitting insurance claims during periods of continuous health plan eligibility |  |

**Supplemental Table 2: Codes used to identify individuals with claims-based evidence of substance use disorders and/or treatment**

| ICD-9-CM 304.0x | Opioid type dependence: ICD-9-CM 304.0x |
| --- | --- |
| HCPCS H0007 | Alcohol and/or drug services; crisis intervention (outpatient) |
| HCPCS H0008 | Alcohol and/or drug services; sub-acute detoxification (hospital inpatient) |
| HCPCS H0009 | Alcohol and/or drug services; acute detoxification (hospital inpatient) |
| HCPCS H0010 | Alcohol and/or drug services; sub-acute detoxification (residential addiction program inpatient) |
| HCPCS H0011 | Alcohol and/or drug services; acute detoxification (residential addiction program inpatient) |
| HCPCS H0012 | Alcohol and/or drug services; sub-acute detoxification (residential addiction program outpatient) |
| HCPCS H0013 | Alcohol and/or drug services; acute detoxification (residential addiction program outpatient) |
| HCPCS H0014 | Alcohol and/or drug services; ambulatory detoxification) |
| HCPCS H0015 | Alcohol and/or drug services; intensive outpatient (treatment program that operates at least 3 hours/day and at least 3 days/week and is based on an individualized treatment plan), including assessment, counseling; crisis intervention, and activity therapies or education |
| HCPCS H0016 | Alcohol and/or drug services; medical/somatic (medical intervention in ambulatory setting) |
| HCPCS H0020 | Alcohol and/or drug services; methadone administration and/or service (provision of the drug by a licensed program) |

ICD-9-CM = International Classification of Diseases, Ninth Revision, Clinical Modification, HCPCS = Healthcare Common Procedure Coding System

**Supplemental Table 3: Behaviors suggestive of abuse, misuse, addiction and/or diversion - Behavior, Justification, References and Operational details**

| **Behavior** | **Justification** | **References** | **Operational details**  Note – all behaviors were identified during the 18-month follow-up period unless otherwise specified. |
| --- | --- | --- | --- |
| **Laboratory findings** | | | |
| Abnormal urine/blood screen | Aberrant behavior indicating abuse of opioids used in validation of the Opioid Risk Tool. | Webster, 2005  Witkin, 2013 | Medical record indicated one or more of the following. Each was captured separately.   - Urine or blood screen negative for prescribed chronic opioids. - Urine or blood screen positive for illicit or non-prescribed controlled substances. |
| **Observed clinical consequences of opioid abuse** | | | |
| Opioid overdose | Aberrant behavior indicating abuse of opioids used in validation of the Opioid Risk Tool. | Webster, 2005  Witkin, 2013 | Medical record indicated one or more of the following:   - Medical record contained at least one reference to an opioid overdose or poisoning. - Medical record contained at least one reference to an overdose or poisoning not attributed to opioids. - Medical record contained at least one reference to an overdose or poisoning where the substance was not described. |
| Death related to opioid use | Aberrant behavior indicating abuse of opioids used in validation of the Opioid Risk Tool. | Webster, 2005 | Medical record indicated one or more of the following:   - The patient was deceased. - Opioids was suspected/reference in the cause of death (overdose, poisoning, or related terms). |
| Oversedated with opioids/intoxicated from opioids | Characteristic associated with opioid misuse status in retrospective medical record review study.  Characteristic associated with substance use disorder. | Cheatle, 2013  Fleming, 2007 | Medical record indicated one or more of the following:   - At least one observed instance of oversedation/intoxication where the treating health care provider suspected opioids as the reason for sedation/intoxication. - At least one record of a phone call where the responder noted signs of sedation/intoxication and suspected opioids as the cause. |
| **Unusual healthcare utilization** | | | |
| Canceled pain clinic visits/no show or no follow-up | Aberrant behavior indicating abuse of opioids used in validation of the Opioid Risk Tool.  Characteristic associated with substance use disorder | Webster, 2005  Fleming, 2007 | Medical record indicated one or more of the following:   - At least one cancelled visit (not rescheduled). - At least one no-show visit. - At least one instance of no follow-up (ie, a patient is instructed to return within one month but does not return). |
| Excessive phone calls requesting opioids | Characteristic associated with opioid misuse status in retrospective medical record review study.  Aberrant Drug Behavior criteria used in Prescription Opioid Therapy Questionnaire | Cheatle, 2013  Chabal, 1997  Jamison, 2010 | Medical record indicated one or more of the following:   - Phone calls requesting opioids. Number of phone calls identified was recorded. - Notes indicating that the office believed that the number of contacts pertaining to the patient seeking opioids was excessive. |
| Excessive visits requesting opioids | Committee of the Seattle Veterans Affairs Medical Center consensus item validated in a pain clinic setting. | Chabal, 1997 | Medical record indicated one or more of the following:   - Visits where the patient requested opioids, number of visits identified. - Notes indicating that the office believed that the number of visits related to the patient seeking opioids was excessive. |
| Requested refills instead of clinic visit | Aberrant behavior indicating abuse of opioids used in validation of the Opioid Risk Tool.  Characteristic associated with substance use disorder | Webster, 2005  Fleming, 2007 | Medical record indicated one or more of the following:   - At least one instance where the patient asked for a refill instead of a visit. - At least one attempt to obtain a refill without a visit in phone log or administrative notes. |
| Reported lost or stolen prescriptions | Aberrant behavior indicating abuse of opioids used in validation of the Opioid Risk Tool.  Characteristic associated with opioid misuse status in retrospective medical record review study.  Aberrant Drug Behavior criteria used in Prescription Opioid Therapy Questionnaire | Webster, 2005  Cheatle, 2013  Jamison, 2010 | Medical record indicated one or more of the following:   - Patient stated that the prescription for opioids was lost, misplaced, or inadvertently destroyed (ie, spilled, thrown away, etc). - Patient stated that the prescription for opioids was retrieved from the pharmacy by someone not authorized by the patient. - Patient stated that the prescription for opioids was stolen either from the pharmacy or from the patient. - Patient reported never receiving filled prescriptions (ie, mail order prescription). |
| Loses medications more than once | Item from a validated questionnaire that was positively associated with addiction status.  Aberrant Drug Behavior criteria used in validation of the Opioid Risk Tool.  Committee of the Seattle Veterans Affairs Medical Center consensus item validated in a pain clinic setting. | Compton, 1998  Witkin, 2013  Chabal, 1997 | Count of the number of instances where the patient’s opioid prescription was lost, misplaced or inadvertently destroyed. |
| Requested early refills more than once from same provider | Item from a validated questionnaire that was positively associated with addiction status.  Aberrant behavior indicating abuse of opioids used in validation of the Opioid Risk Tool.  Characteristic associated with substance use disorder | Compton, 1998  Webster, 2005  Fleming, 2007 | Count of the number of instances where the patient requested an early refill. |
| Was discharged from practice because of egregious aberrant behavior or placed on a watch list | Aberrant behavior indicating abuse of opioids used in validation of the Opioid Risk Tool.  Aberrant Drug Behavior criteria used in validation of the Opioid Risk Tool. | Webster, 2005  Witkin, 2013 | Medical record indicated one or more of the following:   - Practice discontinued care of the patient due to violation of a Patient-Prescriber Agreement for their opioid medication. - Patient was under probation with the practice or dismissed due to suspected abuse, misuse, addiction or diversion of their opioid analgesics. - Patient was under probation with the practice or dismissed due to abusive behavior towards staff. - Patient was under probation with the practice or dismissed due to other behaviors where an explicit mention of opioids is noted in the medical record. - Engaged in violent or confrontational behavior that let to termination of care by the pain physician. |
| Resisted therapy changes/alternative therapy | Aberrant behavior indicating abuse of opioids used in validation of the Opioid Risk Tool.  Characteristic associated with opioid misuse status in retrospective medical record review study.  Aberrant Drug Behavior criteria used in Prescription Opioid Therapy Questionnaire | Webster, 2005  Cheatle, 2013  Jamison, 2010 | Medical record indicated one or more of the following:   - Patient insisted on a particular formulation of opioid analgesic.   - Insisted on a specific product name.   - Insisted on non-abuse deterrent formulations. - Patient insisted on opioid therapy versus alternative pain management forms. - Patient was not compliant with non-opioid pain medication or therapy (ie, did not follow up on physical therapy referral). - Patient resisted change in opioid product. - Patient resisted change to opioid dose. - Patient resisted change from opioid to non-opioid pain medication. - Reported a bad past experience or no relief by non-opioid or alternative products offered. |
| Patient has persistent/non-modifiable pain | Characteristic associated with substance use disorders. | Larson, 2007  Liebschutz, 2010  Potter, 2008  Cheatle, 2014 | Medical record indicated one or more of the following:   - Pain scores or other markers of patient-reported pain did not change with treatment, time of day, or other factors. - Patient reported that nothing decreased their pain. |
| Multiple causes of pain are reported | Characteristic evaluated as a marker of abuse in a retrospective medical record review study. | Cheatle, 2014 | Medical record indicated one or more of the following:   - More than one painful condition; or - Multiple pain complaints requiring opioids (different pain sites/new injuries). |
| Third party required to manage patient’s medications | Aberrant behavior indicating abuse of opioids used in validation of the Opioid Risk Tool. | Webster, 2005 | Medical record indicated one or more of the following:   - Patient was under the care of a conservator. - Patient was enrolled in a drug treatment program that manages their pain medication. - Pain medication was dispensed to the patient only through a third party (nurse, primary care aid, etc). |
| Sold prescription | Aberrant behavior indicating abuse of opioids used in validation of the Opioid Risk Tool. | Webster, 2005 | Medical record indicated that patient sold a prescription/medication or solicited assistance in selling a prescription/medication, either by the patient’s own admission, by the statement of a personal contact of the patient, or through records of legal action taken against the patient. |
| **Inappropriate dose, source or route used** | | | |
| Obtains opioids from a non-medical source | Item from a validated questionnaire that was positively associated with addiction status.  Committee of the Seattle Veterans Affairs Medical Center consensus item validated in a pain clinic setting. | Compton, 1998  Chabal, 1997 | Medical record indicated that patient purchased opioids from a non-medical source (ie, drug dealer, friend), either by the patient’s own admission, by the statement of a personal contact of the patient, or through records of legal action taken against the patient. |
| Forged prescription | Item from a validated questionnaire that was positively associated with addiction status.  Aberrant behavior indicating abuse of opioids used in validation of the Opioid Risk Tool. | Compton, 1998  Webster, 2005 | Medical record indicated that patient forged a prescription or solicited assistance in forging a prescription, either by the patient’s own admission, by the statement of a personal contact of the patient, or through records of legal action taken against the patient. |
| Injected drug | Aberrant behavior indicating abuse of opioids used in validation of the Opioid Risk Tool. | Webster, 2005 | Medical record indicated that patient injected opioids, either by the patient’s own admission, by the statement of a personal contact of the patient. |
| Used additional opioids than those prescribed | Aberrant behavior indicating abuse of opioids used in validation of the Opioid Risk Tool. | Webster, 2005 | Medical record indicated that patient acquired and used an opioid medication not prescribed by this healthcare provider, either by the patient’s own admission or by the statement of a personal contact of the patient. |
| Unauthorized dose escalation | Aberrant behavior indicating abuse of opioids used in validation of the Opioid Risk Tool.  Aberrant Drug Behavior criteria used in validation of the Opioid Risk Tool.  Aberrant Drug Behavior criteria used in Prescription Opioid Therapy Questionnaire | Webster, 2005  Witkin, 2013  Jamison, 2010 | Medical record indicated that patient has used more opioid than was prescribed, either by the patient’s own admission or by the statement of a personal contact of the patient. |
| Emergency room visits to get opioids | Aberrant behavior indicating abuse of opioids used in validation of the Opioid Risk Tool.  Item from a validated questionnaire that was positively associated with addiction status.  Characteristic evaluated (but not associated with misuse) in retrospective medical record review study.  Committee of the Seattle Veterans Affairs Medical Center consensus item validated in a pain clinic setting.  Aberrant Drug Behavior criteria used in Prescription Opioid Therapy Questionnaire | Webster, 2005  Compton, 1998  Cheatle, 2013  Chabal, 1997  Jamison, 2010 | Medical record indicates:   - Count of the number of emergency room visits recorded where the patient requested treatment for pain. - Count of the number of emergency room visits recorded where the patient requested opioids. - Count of the number of emergency room visits recorded where the patient requested opioids and there was reference to a primary care provider or pain specialist referring the patient to the emergency room. |
| Saved/hoarded unused medication | Item from a validated questionnaire that was positively associated with addiction status.  Characteristic associated with substance use disorder. | Compton, 1998  Fleming, 2007 | Medical record indicated that patient saved or hoarded unused opioid medications that were prescribed, either by the patient’s own admission or by the statement of a personal contact of the patient. |
| Solicited opioids from other providers | Aberrant behavior indicating abuse of opioids used in validation of the Opioid Risk Tool.  Committee of the Seattle Veterans Affairs Medical Center consensus item validated in a pain clinic setting. | Webster, 2005  Chabal, 1997 | Medical record indicated that patient has sought opioids from another provider, either by the patient’s own admission, by the statement of a personal contact of the patient, or by records of communication between healthcare providers (discharge summary copied in the medical record, specialist visit notes, etc). |
| **Explicit reference to misuse, diversion, abuse and/or addiction** | | | |
| Abused prescribed drug | Aberrant behavior indicating abuse of opioids used in validation of the Opioid Risk Tool. | Webster, 2005 | Medical record contained reference to opioid abuse, including:   - Illegal use of the drug. - Use of more drug than prescribed for non-medicinal reasons. - Use of quantities or routes (ie, injection, snorting) of the drug meant to enhance intoxication. - Explicit reference to “abuse.” |
| Physician believed patient was addicted | Item from a validated questionnaire that was positively associated with addiction status. | Compton, 1998 | Medical record stated that either:   - The physician suspected opioid addiction. - The physician referred the patient for addiction treatment services. - Physician described impaired control over drug use, compulsive use, continued use despite harm, or craving. |
| Patient believed patient was addicted | Item from a validated questionnaire that was positively associated with addiction status. | Compton, 1998 | Medical record stated that either:   - The patient suspected opioid addiction, and has shared this with the physician or staff. - Patient reported impaired control over drug use, compulsive use, continued use despite harm, and craving. |
| Family believed patient was addicted | Item from a validated questionnaire that was positively associated with addiction status. | Compton, 1998 | Medical record stated that either:   - The family suspected opioid addiction, and this was shared via telephone or other communication. - The family suspected opioid addiction as relayed to the healthcare provider by the patient. - Contacts reported impaired control over drug use, compulsive use, continued use despite harm, or craving. |
| Used opioids for purpose other than pain | Item from a validated questionnaire that was positively associated with addiction status.  Aberrant behavior indicating abuse of opioids used in validation of the Opioid Risk Tool.  Characteristic associated with substance use disorder. | Compton, 1998  Webster, 2005  Fleming, 2007 | Medical record indicated any of the following:   - The patient requested/wanted opioids for anxiety. - The patient requested/wanted opioids for depression. - The patient requested/wanted opioids for sleep disturbances. - The patient was seeking euphoria or intoxication from opioids; or - The patient used opioids for a purpose other than pain. |
| **Risk factors** | | | |
| Spouse/significant other had a substance use disorder | Item from a validated questionnaire that was positively associated with addiction status. | Compton, 1998 | Medical record indicates:   - The patient’s spouse/significant other had a suspected or confirmed drug abuse problem. - The patient’s spouse/significant other sought treatment for drug abuse. |
| Concurrent or history of substance use disorder | Medical record review study showing that abuse history was associated with aberrant drug behavior. | Michna, 2004 | Medical record indicated:   - References to substance abuse either by the patient’s own admission, by the statement of a personal contact of the patient, or by records of communication between healthcare providers. - Physician recommendation for substance abuse treatment programs. - Patient was enrolled in a substance abuse treatment program. - Current substance abuse and history of substance abuse were recorded separately. |
| Concurrent or history of abuse of alcohol | Aberrant behavior indicating abuse of opioids used in validation of the Opioid Risk Tool.  Item from a validated questionnaire that was positively associated with addiction status.  Medical record review study showing that abuse history was associated with aberrant drug behavior. | Webster, 2005  Compton, 1998  Michna, 2004 | Medical record indicated:   - References to alcohol abuse either by the patient’s own admission, by the statement of a personal contact of the patient, or by records of communication between healthcare providers. - Physician recommendation for alcohol abuse treatment programs. - Treatment with products used off-label for alcohol abuse (topiramate, etc) with explicit reference that the medication is given for alcohol abuse. - Current alcohol abuse and history of alcohol abuse were recorded separately. |
| Use of alcohol for pain management | Characteristic associated with substance use disorder. | Fleming, 2007 | Medical record indicated one or more of the following.   - Patient used alcohol because of pain; or - Patient used alcohol and opioids together. |

**Supplemental Table 3: Behaviors suggestive of abuse, misuse, addiction and/or diversion - Behavior, Justification, References and Operational details**

| **Behavior** | **Justification** | **References** | **Operational details**  Note – all behaviors were identified during the 18-month follow-up period unless otherwise specified. |
| --- | --- | --- | --- |
| **Laboratory findings** | | | |
| Abnormal urine/blood screen | Aberrant behavior indicating abuse of opioids used in validation of the Opioid Risk Tool. | Webster, 2005  Witkin, 2013 | Medical record indicated one or more of the following. Each was captured separately.   - Urine or blood screen negative for prescribed chronic opioids. - Urine or blood screen positive for illicit or non-prescribed controlled substances. |
| **Observed clinical consequences of opioid abuse** | | | |
| Opioid overdose | Aberrant behavior indicating abuse of opioids used in validation of the Opioid Risk Tool. | Webster, 2005  Witkin, 2013 | Medical record indicated one or more of the following:   - Medical record contained at least one reference to an opioid overdose or poisoning. - Medical record contained at least one reference to an overdose or poisoning not attributed to opioids. - Medical record contained at least one reference to an overdose or poisoning where the substance was not described. |
| Death related to opioid use | Aberrant behavior indicating abuse of opioids used in validation of the Opioid Risk Tool. | Webster, 2005 | Medical record indicated one or more of the following:   - The patient was deceased. - Opioids was suspected/reference in the cause of death (overdose, poisoning, or related terms). |
| Oversedated with opioids/intoxicated from opioids | Characteristic associated with opioid misuse status in retrospective medical record review study.  Characteristic associated with substance use disorder. | Cheatle, 2013  Fleming, 2007 | Medical record indicated one or more of the following:   - At least one observed instance of oversedation/intoxication where the treating health care provider suspected opioids as the reason for sedation/intoxication. - At least one record of a phone call where the responder noted signs of sedation/intoxication and suspected opioids as the cause. |
| **Unusual healthcare utilization** | | | |
| Canceled pain clinic visits/no show or no follow-up | Aberrant behavior indicating abuse of opioids used in validation of the Opioid Risk Tool.  Characteristic associated with substance use disorder | Webster, 2005  Fleming, 2007 | Medical record indicated one or more of the following:   - At least one cancelled visit (not rescheduled). - At least one no-show visit. - At least one instance of no follow-up (ie, a patient is instructed to return within one month but does not return). |
| Excessive phone calls requesting opioids | Characteristic associated with opioid misuse status in retrospective medical record review study.  Aberrant Drug Behavior criteria used in Prescription Opioid Therapy Questionnaire | Cheatle, 2013  Chabal, 1997  Jamison, 2010 | Medical record indicated one or more of the following:   - Phone calls requesting opioids. Number of phone calls identified was recorded. - Notes indicating that the office believed that the number of contacts pertaining to the patient seeking opioids was excessive. |
| Excessive visits requesting opioids | Committee of the Seattle Veterans Affairs Medical Center consensus item validated in a pain clinic setting. | Chabal, 1997 | Medical record indicated one or more of the following:   - Visits where the patient requested opioids, number of visits identified. - Notes indicating that the office believed that the number of visits related to the patient seeking opioids was excessive. |
| Requested refills instead of clinic visit | Aberrant behavior indicating abuse of opioids used in validation of the Opioid Risk Tool.  Characteristic associated with substance use disorder | Webster, 2005  Fleming, 2007 | Medical record indicated one or more of the following:   - At least one instance where the patient asked for a refill instead of a visit. - At least one attempt to obtain a refill without a visit in phone log or administrative notes. |
| Reported lost or stolen prescriptions | Aberrant behavior indicating abuse of opioids used in validation of the Opioid Risk Tool.  Characteristic associated with opioid misuse status in retrospective medical record review study.  Aberrant Drug Behavior criteria used in Prescription Opioid Therapy Questionnaire | Webster, 2005  Cheatle, 2013  Jamison, 2010 | Medical record indicated one or more of the following:   - Patient stated that the prescription for opioids was lost, misplaced, or inadvertently destroyed (ie, spilled, thrown away, etc). - Patient stated that the prescription for opioids was retrieved from the pharmacy by someone not authorized by the patient. - Patient stated that the prescription for opioids was stolen either from the pharmacy or from the patient. - Patient reported never receiving filled prescriptions (ie, mail order prescription). |
| Loses medications more than once | Item from a validated questionnaire that was positively associated with addiction status.  Aberrant Drug Behavior criteria used in validation of the Opioid Risk Tool.  Committee of the Seattle Veterans Affairs Medical Center consensus item validated in a pain clinic setting. | Compton, 1998  Witkin, 2013  Chabal, 1997 | Count of the number of instances where the patient’s opioid prescription was lost, misplaced or inadvertently destroyed. |
| Requested early refills more than once from same provider | Item from a validated questionnaire that was positively associated with addiction status.  Aberrant behavior indicating abuse of opioids used in validation of the Opioid Risk Tool.  Characteristic associated with substance use disorder | Compton, 1998  Webster, 2005  Fleming, 2007 | Count of the number of instances where the patient requested an early refill. |
| Was discharged from practice because of egregious aberrant behavior or placed on a watch list | Aberrant behavior indicating abuse of opioids used in validation of the Opioid Risk Tool.  Aberrant Drug Behavior criteria used in validation of the Opioid Risk Tool. | Webster, 2005  Witkin, 2013 | Medical record indicated one or more of the following:   - Practice discontinued care of the patient due to violation of a Patient-Prescriber Agreement for their opioid medication. - Patient was under probation with the practice or dismissed due to suspected abuse, misuse, addiction or diversion of their opioid analgesics. - Patient was under probation with the practice or dismissed due to abusive behavior towards staff. - Patient was under probation with the practice or dismissed due to other behaviors where an explicit mention of opioids is noted in the medical record. - Engaged in violent or confrontational behavior that let to termination of care by the pain physician. |
| Resisted therapy changes/alternative therapy | Aberrant behavior indicating abuse of opioids used in validation of the Opioid Risk Tool.  Characteristic associated with opioid misuse status in retrospective medical record review study.  Aberrant Drug Behavior criteria used in Prescription Opioid Therapy Questionnaire | Webster, 2005  Cheatle, 2013  Jamison, 2010 | Medical record indicated one or more of the following:   - Patient insisted on a particular formulation of opioid analgesic.   - Insisted on a specific product name.   - Insisted on non-abuse deterrent formulations. - Patient insisted on opioid therapy versus alternative pain management forms. - Patient was not compliant with non-opioid pain medication or therapy (ie, did not follow up on physical therapy referral). - Patient resisted change in opioid product. - Patient resisted change to opioid dose. - Patient resisted change from opioid to non-opioid pain medication. - Reported a bad past experience or no relief by non-opioid or alternative products offered. |
| Patient has persistent/non-modifiable pain | Characteristic associated with substance use disorders. | Larson, 2007  Liebschutz, 2010  Potter, 2008  Cheatle, 2014 | Medical record indicated one or more of the following:   - Pain scores or other markers of patient-reported pain did not change with treatment, time of day, or other factors. - Patient reported that nothing decreased their pain. |
| Multiple causes of pain are reported | Characteristic evaluated as a marker of abuse in a retrospective medical record review study. | Cheatle, 2014 | Medical record indicated one or more of the following:   - More than one painful condition; or - Multiple pain complaints requiring opioids (different pain sites/new injuries). |
| Third party required to manage patient’s medications | Aberrant behavior indicating abuse of opioids used in validation of the Opioid Risk Tool. | Webster, 2005 | Medical record indicated one or more of the following:   - Patient was under the care of a conservator. - Patient was enrolled in a drug treatment program that manages their pain medication. - Pain medication was dispensed to the patient only through a third party (nurse, primary care aid, etc). |
| Sold prescription | Aberrant behavior indicating abuse of opioids used in validation of the Opioid Risk Tool. | Webster, 2005 | Medical record indicated that patient sold a prescription/medication or solicited assistance in selling a prescription/medication, either by the patient’s own admission, by the statement of a personal contact of the patient, or through records of legal action taken against the patient. |
| **Inappropriate dose, source or route used** | | | |
| Obtains opioids from a non-medical source | Item from a validated questionnaire that was positively associated with addiction status.  Committee of the Seattle Veterans Affairs Medical Center consensus item validated in a pain clinic setting. | Compton, 1998  Chabal, 1997 | Medical record indicated that patient purchased opioids from a non-medical source (ie, drug dealer, friend), either by the patient’s own admission, by the statement of a personal contact of the patient, or through records of legal action taken against the patient. |
| Forged prescription | Item from a validated questionnaire that was positively associated with addiction status.  Aberrant behavior indicating abuse of opioids used in validation of the Opioid Risk Tool. | Compton, 1998  Webster, 2005 | Medical record indicated that patient forged a prescription or solicited assistance in forging a prescription, either by the patient’s own admission, by the statement of a personal contact of the patient, or through records of legal action taken against the patient. |
| Injected drug | Aberrant behavior indicating abuse of opioids used in validation of the Opioid Risk Tool. | Webster, 2005 | Medical record indicated that patient injected opioids, either by the patient’s own admission, by the statement of a personal contact of the patient. |
| Used additional opioids than those prescribed | Aberrant behavior indicating abuse of opioids used in validation of the Opioid Risk Tool. | Webster, 2005 | Medical record indicated that patient acquired and used an opioid medication not prescribed by this healthcare provider, either by the patient’s own admission or by the statement of a personal contact of the patient. |
| Unauthorized dose escalation | Aberrant behavior indicating abuse of opioids used in validation of the Opioid Risk Tool.  Aberrant Drug Behavior criteria used in validation of the Opioid Risk Tool.  Aberrant Drug Behavior criteria used in Prescription Opioid Therapy Questionnaire | Webster, 2005  Witkin, 2013  Jamison, 2010 | Medical record indicated that patient has used more opioid than was prescribed, either by the patient’s own admission or by the statement of a personal contact of the patient. |
| Emergency room visits to get opioids | Aberrant behavior indicating abuse of opioids used in validation of the Opioid Risk Tool.  Item from a validated questionnaire that was positively associated with addiction status.  Characteristic evaluated (but not associated with misuse) in retrospective medical record review study.  Committee of the Seattle Veterans Affairs Medical Center consensus item validated in a pain clinic setting.  Aberrant Drug Behavior criteria used in Prescription Opioid Therapy Questionnaire | Webster, 2005  Compton, 1998  Cheatle, 2013  Chabal, 1997  Jamison, 2010 | Medical record indicates:   - Count of the number of emergency room visits recorded where the patient requested treatment for pain. - Count of the number of emergency room visits recorded where the patient requested opioids. - Count of the number of emergency room visits recorded where the patient requested opioids and there was reference to a primary care provider or pain specialist referring the patient to the emergency room. |
| Saved/hoarded unused medication | Item from a validated questionnaire that was positively associated with addiction status.  Characteristic associated with substance use disorder. | Compton, 1998  Fleming, 2007 | Medical record indicated that patient saved or hoarded unused opioid medications that were prescribed, either by the patient’s own admission or by the statement of a personal contact of the patient. |
| Solicited opioids from other providers | Aberrant behavior indicating abuse of opioids used in validation of the Opioid Risk Tool.  Committee of the Seattle Veterans Affairs Medical Center consensus item validated in a pain clinic setting. | Webster, 2005  Chabal, 1997 | Medical record indicated that patient has sought opioids from another provider, either by the patient’s own admission, by the statement of a personal contact of the patient, or by records of communication between healthcare providers (discharge summary copied in the medical record, specialist visit notes, etc). |
| **Explicit reference to misuse, diversion, abuse and/or addiction** | | | |
| Abused prescribed drug | Aberrant behavior indicating abuse of opioids used in validation of the Opioid Risk Tool. | Webster, 2005 | Medical record contained reference to opioid abuse, including:   - Illegal use of the drug. - Use of more drug than prescribed for non-medicinal reasons. - Use of quantities or routes (ie, injection, snorting) of the drug meant to enhance intoxication. - Explicit reference to “abuse.” |
| Physician believed patient was addicted | Item from a validated questionnaire that was positively associated with addiction status. | Compton, 1998 | Medical record stated that either:   - The physician suspected opioid addiction. - The physician referred the patient for addiction treatment services. - Physician described impaired control over drug use, compulsive use, continued use despite harm, or craving. |
| Patient believed patient was addicted | Item from a validated questionnaire that was positively associated with addiction status. | Compton, 1998 | Medical record stated that either:   - The patient suspected opioid addiction, and has shared this with the physician or staff. - Patient reported impaired control over drug use, compulsive use, continued use despite harm, and craving. |
| Family believed patient was addicted | Item from a validated questionnaire that was positively associated with addiction status. | Compton, 1998 | Medical record stated that either:   - The family suspected opioid addiction, and this was shared via telephone or other communication. - The family suspected opioid addiction as relayed to the healthcare provider by the patient. - Contacts reported impaired control over drug use, compulsive use, continued use despite harm, or craving. |
| Used opioids for purpose other than pain | Item from a validated questionnaire that was positively associated with addiction status.  Aberrant behavior indicating abuse of opioids used in validation of the Opioid Risk Tool.  Characteristic associated with substance use disorder. | Compton, 1998  Webster, 2005  Fleming, 2007 | Medical record indicated any of the following:   - The patient requested/wanted opioids for anxiety. - The patient requested/wanted opioids for depression. - The patient requested/wanted opioids for sleep disturbances. - The patient was seeking euphoria or intoxication from opioids; or - The patient used opioids for a purpose other than pain. |
| **Risk factors** | | | |
| Spouse/significant other had a substance use disorder | Item from a validated questionnaire that was positively associated with addiction status. | Compton, 1998 | Medical record indicates:   - The patient’s spouse/significant other had a suspected or confirmed drug abuse problem. - The patient’s spouse/significant other sought treatment for drug abuse. |
| Concurrent or history of substance use disorder | Medical record review study showing that abuse history was associated with aberrant drug behavior. | Michna, 2004 | Medical record indicated:   - References to substance abuse either by the patient’s own admission, by the statement of a personal contact of the patient, or by records of communication between healthcare providers. - Physician recommendation for substance abuse treatment programs. - Patient was enrolled in a substance abuse treatment program. - Current substance abuse and history of substance abuse were recorded separately. |
| Concurrent or history of abuse of alcohol | Aberrant behavior indicating abuse of opioids used in validation of the Opioid Risk Tool.  Item from a validated questionnaire that was positively associated with addiction status.  Medical record review study showing that abuse history was associated with aberrant drug behavior. | Webster, 2005  Compton, 1998  Michna, 2004 | Medical record indicated:   - References to alcohol abuse either by the patient’s own admission, by the statement of a personal contact of the patient, or by records of communication between healthcare providers. - Physician recommendation for alcohol abuse treatment programs. - Treatment with products used off-label for alcohol abuse (topiramate, etc) with explicit reference that the medication is given for alcohol abuse. - Current alcohol abuse and history of alcohol abuse were recorded separately. |
| Use of alcohol for pain management | Characteristic associated with substance use disorder. | Fleming, 2007 | Medical record indicated one or more of the following.   - Patient used alcohol because of pain; or - Patient used alcohol and opioids together. |

**Supplemental Table 4: Behaviors suggestive of abuse, misuse, addiction and/or diversion – Patients with medical records reviewed and all eligible opioid users**

|  | **Patients with medical records reviewed** | | | | | | | | | | **All eligible opioid users** | | | | | | | | | | | |
| --- | --- | --- | --- | --- | --- | --- | --- | --- | --- | --- | --- | --- | --- | --- | --- | --- | --- | --- | --- | --- | --- | --- |
|  | **No shopping** | | **Minimal shopping** | | **Moderate shopping** | | | **Severe shopping** | | | **No shopping** | | | **Minimal shopping** | | | **Moderate shopping** | | | **Severe shopping** | | |
| **N = 115** | | **N = 139** | | **N = 147** | | | **N = 189** | | | **N = 243,554** | | | **N = 35,073** | | | **N = 23,543** | | | **N = 10,302** | | |
| **N** | **%** | **N** | **%** | | **N** | **%** | | **N** | **%** | | **N** | **%** | | **N** | **%** | | **N** | **%** | | **N** | **%** |
| Age category (years) |  |  |  |  | |  |  | |  |  | |  |  | |  |  | |  |  | |  |  |
| 18 to 34 | 17 | 14.8 | 23 | 16.5 | | 34 | 23.1 | | 41 | 21.7 | | 32,616 | 13.4 | | 5,665 | 16.2 | | 4,415 | 18.8 | | 2,183 | 21.2 |
| 35 to 49 | 26 | 22.6 | 41 | 29.5 | | 50 | 34.0 | | 70 | 37.0 | | 58,868 | 24.2 | | 9,516 | 27.1 | | 6,985 | 29.7 | | 3,431 | 33.3 |
| 50 to 64 | 45 | 39.1 | 57 | 41.0 | | 45 | 30.6 | | 51 | 27.0 | | 86,108 | 35.4 | | 12,548 | 35.8 | | 8,136 | 34.6 | | 3,443 | 33.4 |
| 65+ | 27 | 23.5 | 18 | 12.9 | | 18 | 12.2 | | 27 | 14.3 | | 65,962 | 27.1 | | 7,344 | 20.9 | | 4,007 | 17.0 | | 1,245 | 12.1 |
| Female | 62 | 53.9 | 79 | 56.8 | | 75 | 51.0 | | 117 | 61.9 | | 134,134 | 55.1 | | 19,608 | 55.9 | | 13,333 | 56.6 | | 6,051 | 58.7 |
| Geographic region of residence (US) |  |  |  |  | |  |  | |  |  | |  |  | |  |  | |  |  | |  |  |
| Midwest | 31 | 27.0 | 34 | 24.5 | | 41 | 27.9 | | 44 | 23.3 | | 70,124 | 28.8 | | 10,160 | 29.0 | | 6,681 | 26.2 | | 2,704 | 26.2 |
| Northwest | 13 | 11.3 | 14 | 10.1 | | 23 | 15.6 | | 23 | 12.2 | | 28,468 | 11.7 | | 3,830 | 10.9 | | 2,560 | 10.0 | | 1,111 | 10.8 |
| South | 39 | 33.9 | 44 | 31.7 | | 46 | 31.3 | | 70 | 37.0 | | 73,275 | 30.1 | | 11,080 | 31.6 | | 7,556 | 29.6 | | 3,573 | 34.7 |
| West | 28 | 24.3 | 43 | 30.9 | | 36 | 24.5 | | 52 | 27.5 | | 68,607 | 28.2 | | 9,419 | 26.9 | | 6,249 | 24.5 | | 2,684 | 26.1 |
| Missing/unknown | ≤10 |  | ≤10 |  | | ≤10 |  | | 0 | 0.0 | | 3,080 | 1.3 | | 584 | 1.7 | | 497 | 1.9 | | 230 | 2.2 |
| Reason for end of follow-up |  |  |  |  | |  |  | |  |  | |  |  | |  |  | |  |  | |  |  |
| End of 18-month window | 112 | 97.4 | 136 | 97.8 | | 145 | 98.6 | | 183 | 96.8 | | 240,156 | 98.6 | | 34,580 | 98.6 | | 23,129 | 98.2 | | 10,064 | 97.7 |
| Presumed death | ≤10 |  | ≤10 |  | | ≤10 |  | | ≤10 |  | | 3,398 | 1.4 | | 493 | 1.4 | | 414 | 1.8 | | 238 | 2.3 |
| Healthcare utilization  (Mean ± SD) |  |  |  |  | |  |  | |  |  | |  |  | |  |  | |  |  | |  |  |
| Office visits | 12.7 ± 9.27 | | 15.5 ± 11.72 | | 17.6 ± 12.7 | | | 25.1±14.89 | | | 4.33 ± 4.37 | | | 4.77 ± 4.63 | | | 5.17 ± 4.99 | | | 5.90 ± 5.55 | | |
| Emergency room visits | 0.6 ± 1.25 | | 0.8 ± 1.13 | | 1.1 ± 1.52 | | | 1.8 ± 2.58 | | | 0.17 ± 0.48 | | | 0.22 ± 0.58 | | | 0.28 ± 0.74 | | | 0.46 ± 1.18 | | |
| Hospitalizations | 0.5 ± 1.17 | | 0.4 ± 0.61 | | 0.6 ± 1.21 | | | 0.9 ± 1.52 | | | 0.16 ± 0.49 | | | 0.18 ± 0.53 | | | 0.19 ± 0.55 | | | 0.25 ± 0.66 | | |
| Distinct medications | 12.2 ± 7.17 | | 13.4 ± 6.9 | | 14.6 ± 6.82 | | | 19.7 ± 9.06 | | | 5.89 ± 4.82 | | | 6.47 ± 5.13 | | | 6.99 ± 5.42 | | | 8.11 ± 5.94 | | |
| Clinical Characteristics |  |  |  |  | |  |  | |  |  | |  |  | |  |  | |  |  | |  |  |
| Selected pain diagnosis: |  |  |  |  | |  |  | |  |  | |  |  | |  |  | |  |  | |  |  |
| Abdominal pain | 34 | 29.6 | 50 | 36.0 | | 52 | 35.4 | | 88 | 46.6 | | 97,050 | 39.8 | | 15,362 | 43.8 | | 10,852 | 46.1 | | 5,364 | 52.1 |
| Arthritis/musculoskeletal  pain | 41 | 35.7 | 63 | 45.3 | | 66 | 44.9 | | 94 | 49.7 | | 112,368 | 46.1 | | 16,404 | 46.8 | | 11,008 | 46.8 | | 4,789 | 46.5 |
| Back pain | 63 | 54.8 | 83 | 59.7 | | 90 | 61.2 | | 137 | 72.5 | | 144,294 | 59.2 | | 22,508 | 64.2 | | 15,723 | 66.8 | | 7,400 | 71.8 |
| Chronic pain | 14 | 12.2 | 21 | 15.1 | | 21 | 14.3 | | 50 | 26.5 | | 18,118 | 7.4 | | 3,798 | 10.8 | | 3,149 | 13.4 | | 1,868 | 18.1 |
| Fibromyalgia | 15 | 13 | 18 | 13 | | 28 | 19 | | 48 | 25 | | 40,967 | 17 | | 6,965 | 20 | | 5,209 | 22 | | 2,568 | 25 |
| Headache | 18 | 16 | 40 | 29 | | 38 | 26 | | 80 | 42 | | 65,233 | 27 | | 10,879 | 31 | | 7,956 | 34 | | 4,193 | 41 |
| Malignancy | 15 | 13 | 20 | 14 | | 29 | 20 | | 35 | 19 | | 44,908 | 18 | | 6,337 | 18 | | 4,051 | 17 | | 1,877 | 18 |
| Selected psychiatric comorbidities: |  |  |  |  | |  |  | |  |  | |  |  | |  |  | |  |  | |  |  |
| Anxiety disorder | 28 | 24 | 37 | 27 | | 43 | 29 | | 69 | 37 | | 55,271 | 23 | | 9,511 | 27 | | 7,170 | 31 | | 3,774 | 37 |
| Depressive disorder | 15 | 13 | 26 | 19 | | 30 | 20 | | 50 | 27 | | 43,036 | 18 | | 7,460 | 21 | | 5,620 | 24 | | 2,943 | 27 |
| Sleep disorder | 20 | 17 | 34 | 25 | | 31 | 21 | | 70 | 37 | | 57,901 | 24 | | 9,478 | 27 | | 6,776 | 29 | | 3,296 | 32 |
| Medication use |  |  |  |  | |  |  | |  |  | |  |  | |  |  | |  |  | |  |  |
| New opioid analgesic user | 35 | 30 | 41 | 30 | | 33 | 22 | | 33 | 18 | | 69,677 | 29 | | 8,114 | 23 | | 4,661 | 20 | | 1,551 | 15 |
| Use of opioid analgesics |  |  |  |  | |  |  | |  |  | |  |  | |  |  | |  |  | |  |  |
| ER/LA only | ≤10 |  | ≤10 |  | | 0 | 0 | | ≤10 |  | | 677 | 0.3 | | 110 | 0.3 | | 59 | 0.3 | | 30 | 0.3 |
| Immediate release only | 107 | 93 | 120 | 86 | | 121 | 82 | | 127 | 67 | | 157,802 | 65 | | 23,216 | 66 | | 15,680 | 67 | | 6,945 | 67 |
| Both | ≤10 |  | 18 | 13 | | 26 | 18 | | 61 | 32 | | 15,226 | 6 | | 3,611 | 10 | | 3,136 | 13 | | 1,773 | 17 |
| Number of opioid dispensings |  | |  | |  | | |  | | |  | | |  | | |  | | |  | | |
| (Mean ± SD) | 6.9 ± 6.38 | | 9.1 ± 7.84 | | 11.0 ± 9.36 | | | 17.3 ± 9.68 | | | 9.43 ± 18.69 | | | 12.57 ± 22.71 | | | 15.17 ± 24.99 | | | 19.83 ± 28.97 | | |
| Median |  | 3 |  | 3 | |  | 4 | |  | 8 | |  | 2 | |  | 4 | |  | 5 | |  | 8 |
| Range (min, max) | 0, 96 | | 0, 115 | | 0, 160 | | | 0, 146 | | | 0, 671 | | | 0, 356 | | | 0, 365 | | | 0, 310 | | |
| Use of benzodiazepines | 51 | 44 | 74 | 53 | | 63 | 43 | | 129 | 68 | | 75,634 | 31 | | 12,937 | 37 | | 9,781 | 42 | | 5,089 | 49 |
| Use of other sleep  medications | 32 | 28 | 46 | 33 | | 39 | 27 | | 90 | 48 | | 52,023 | 21 | | 8,907 | 25 | | 6,773 | 29 | | 3,425 | 33 |

Abbreviations: N—number, US—United States, SD—standard deviation, ER/LA—extended-release/long-acting, min—minimum, max—maximum.

Counts less than or equal to 10 have been blinded to protect patient privacy.
